# Supplementary material for: 3D printable gelatin/nisin biomaterial inks for antimicrobial tissue engineering applications
Source: Royal Society of Chemistry journal article supplement (doi:10.1039/d4ma00544a), 2024-01-01
Supplement: d4ma00544a1.pdf [file d4ma00544a1.pdf]

## **3D printable gelatin/nisin biomaterial inks for antimicrobial tissue engineering applications**

Mateo Dallos Ortega<sup>1</sup>, Jenny Aveyard<sup>1</sup>, Alexander Ciupa<sup>2</sup>, Robert J Poole<sup>1</sup>, David Whetnall<sup>2</sup>,  
Julia G. Behnsen<sup>1</sup> and Raechelle A. D'Sa<sup>1</sup>

<sup>1</sup>School of Engineering, University of Liverpool, Harrison Hughes Building, Brownlow Hill,  
Liverpool, L69 3GH, UK

<sup>2</sup>Materials Innovation Factory, University of Liverpool, 51 Oxford Street, Liverpool L7 3NY,  
UK

\*Corresponding author: [r.dsa@liverpool.ac.uk](mailto:r.dsa@liverpool.ac.uk)

Supplementary Information

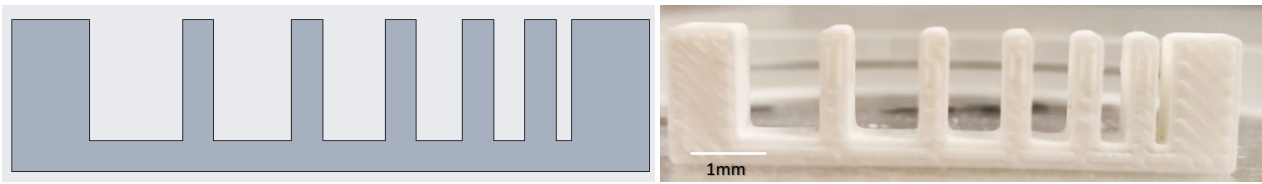

**Figure S1:** CAD design and printed seven pillar stage.

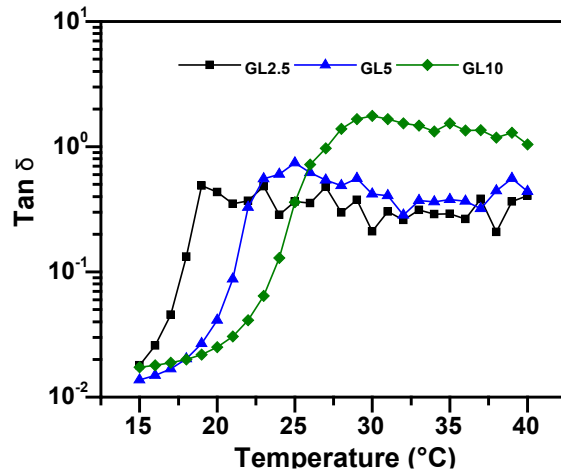

**Figure S2:** Tan  $\delta$  values as a function of temperature. Viscoelastic characterization of gelatin inks.

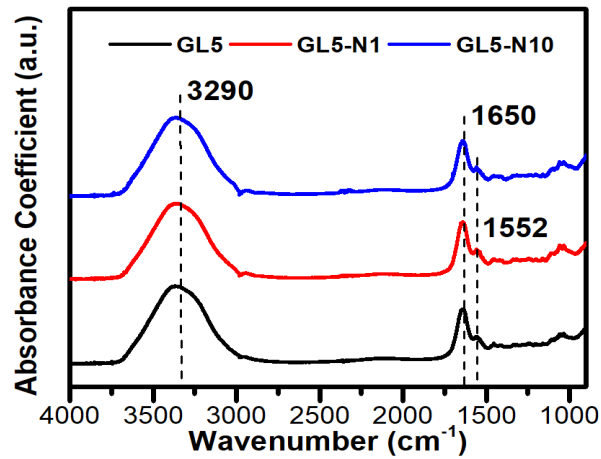

**Figure S3:** Fourier-transform infrared spectroscopy of GL5, GL5-N1 and GL5-N10 inks.

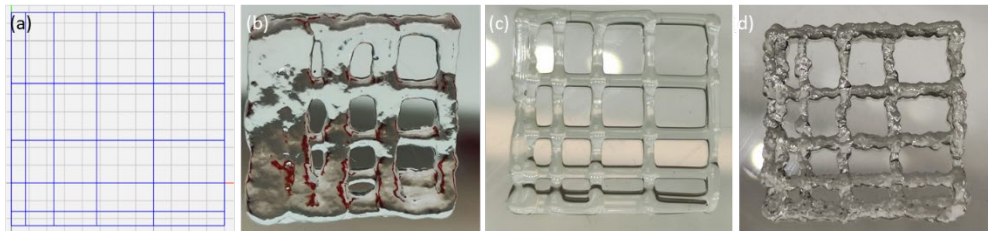

**Figure S4:** Printed grid patterns to assess diffusion rate percentage. a) 2D design of grid pattern designs. b) GL2.5 ink. c) GL5 ink. D) GL10 ink.

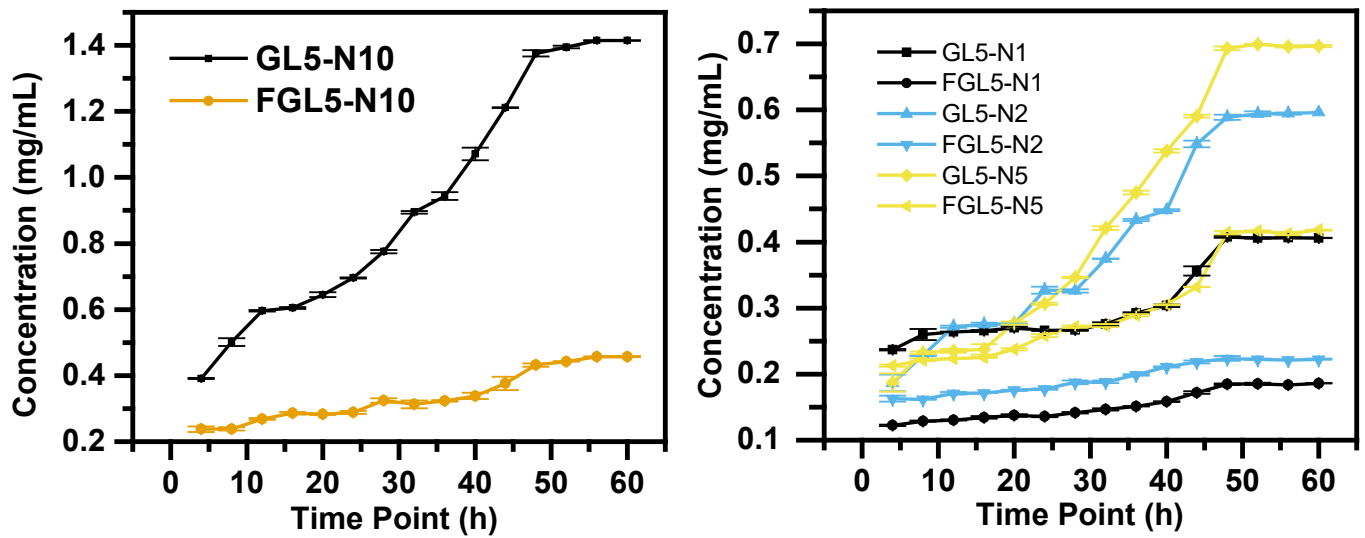

**Figure S5:** Nisin drug release for all ink concentrations over a 60-hour period measured by high-performance liquid chromatography (HPLC).
